# Supplementary material for: Non-nuclear localization signal-guided CRISPR/Cas9 ribonucleoproteins for translocation and gene editing via apoferritin delivery vectors
Source: Royal Society of Chemistry journal article supplement (doi:10.1039/d4nr04762a), 2025-01-01
Supplement: d4nr04762a1.pdf [file d4nr04762a1.pdf]

Supporting Information

# **None Nuclear Localization Signal-guided CRISPR/Cas9 Ribonucleoproteins for Translocation and Gene Editing Via Apoferritin Delivery Vectors**

Peng Sun <sup>a</sup>, Shiping Wang <sup>a</sup>, Qi Yan <sup>a</sup>, Jia Zeng <sup>a</sup>, Zhenghong Wu <sup>a\*</sup>, Xiaole Qi <sup>a, b, \*</sup>

<sup>a</sup> *Key Laboratory of Modern Chinese Medicines, China Pharmaceutical University, Nanjing  
210009, PR China;*

<sup>b</sup> *Industrial Technology Innovation Platform, Zhejiang Center for Safety Study of Drug  
Substances, Hangzhou 310018, China.*

\*Corresponding author: Zhenghong Wu; Xiaole Qi

E-mail address: zhenghongwu66@cpu.edu.cn (Z. H. Wu); qixiaole523@cpu.edu.cn (Xiaole  
Qi).

Tel: +0086-15062208341 (Zhenghong Wu); +0086-25 83179703 (Xiaole Qi)

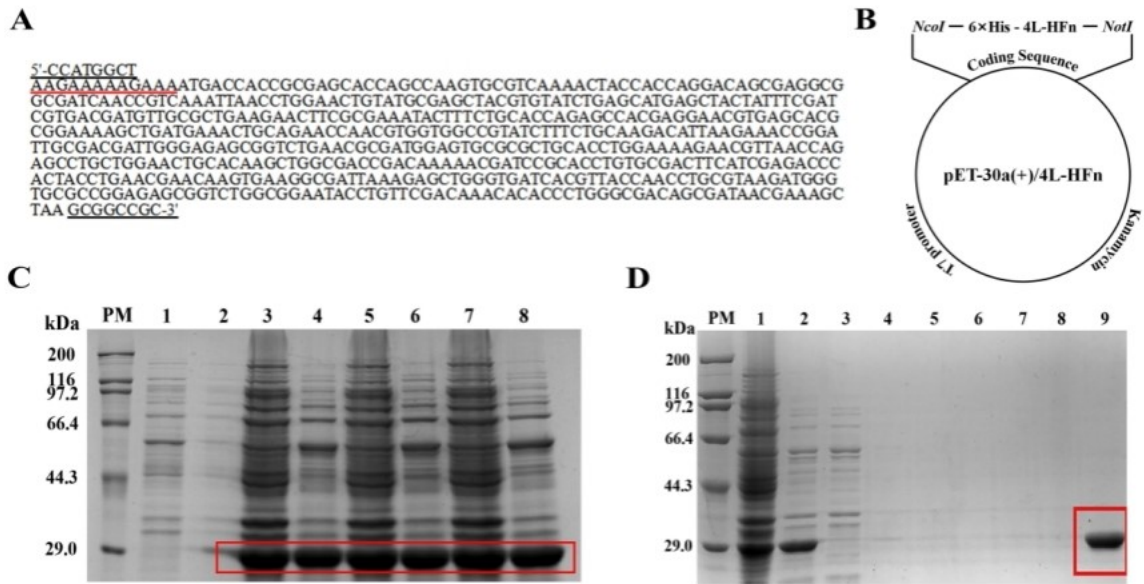

**Figure S1.** Preparation and characterization of 4L-HFn. (A) Optimized 4L-HFn gene Sequence (5' to 3' direction). (B) Plasmid of pET-30a(+)/4L-HFn. (C) SDS-PAGE of construction of 4L-HFn engineering bacteria. PM:Protein Marker; 1-2:ArcticExpress(DE3) negative control bacteria total bacteria and supernatant; 3-8: three batch of genetic engineering bacteria total bacteria and supernatant. (D) SDS-PAGE of purified 4L-HFn. 1: total bacterial solution before bacterial breakdown; 2: supernatant after bacterial breakdown; 3: sample penetration; 4:Binding Buffer runoff; 5-9: 30, 50, 70, 90, 300 mM imidazole eluent.

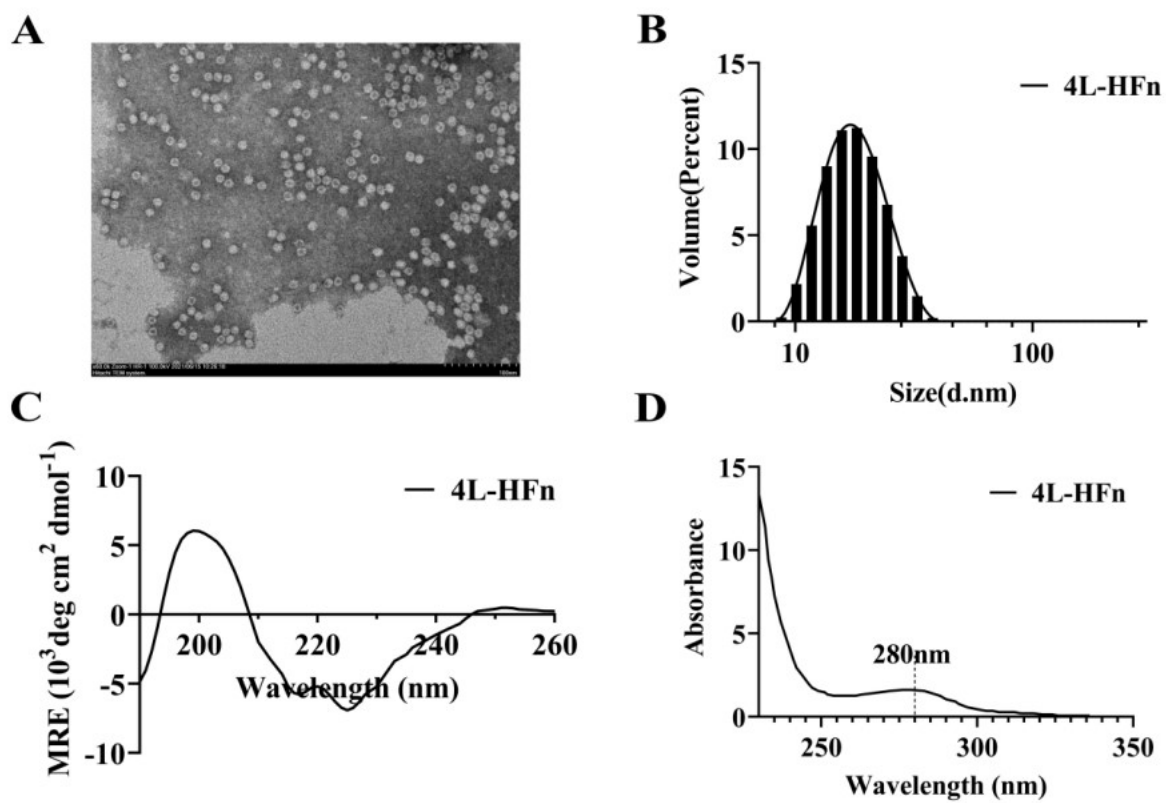

**Figure S2.** The characterizations of 4L-HFn. (A) TEM. (Scale: 100 nm). (B) Distribution of hydrodynamic diameter. (C) CD spectra. (D) UV-visible spectra.

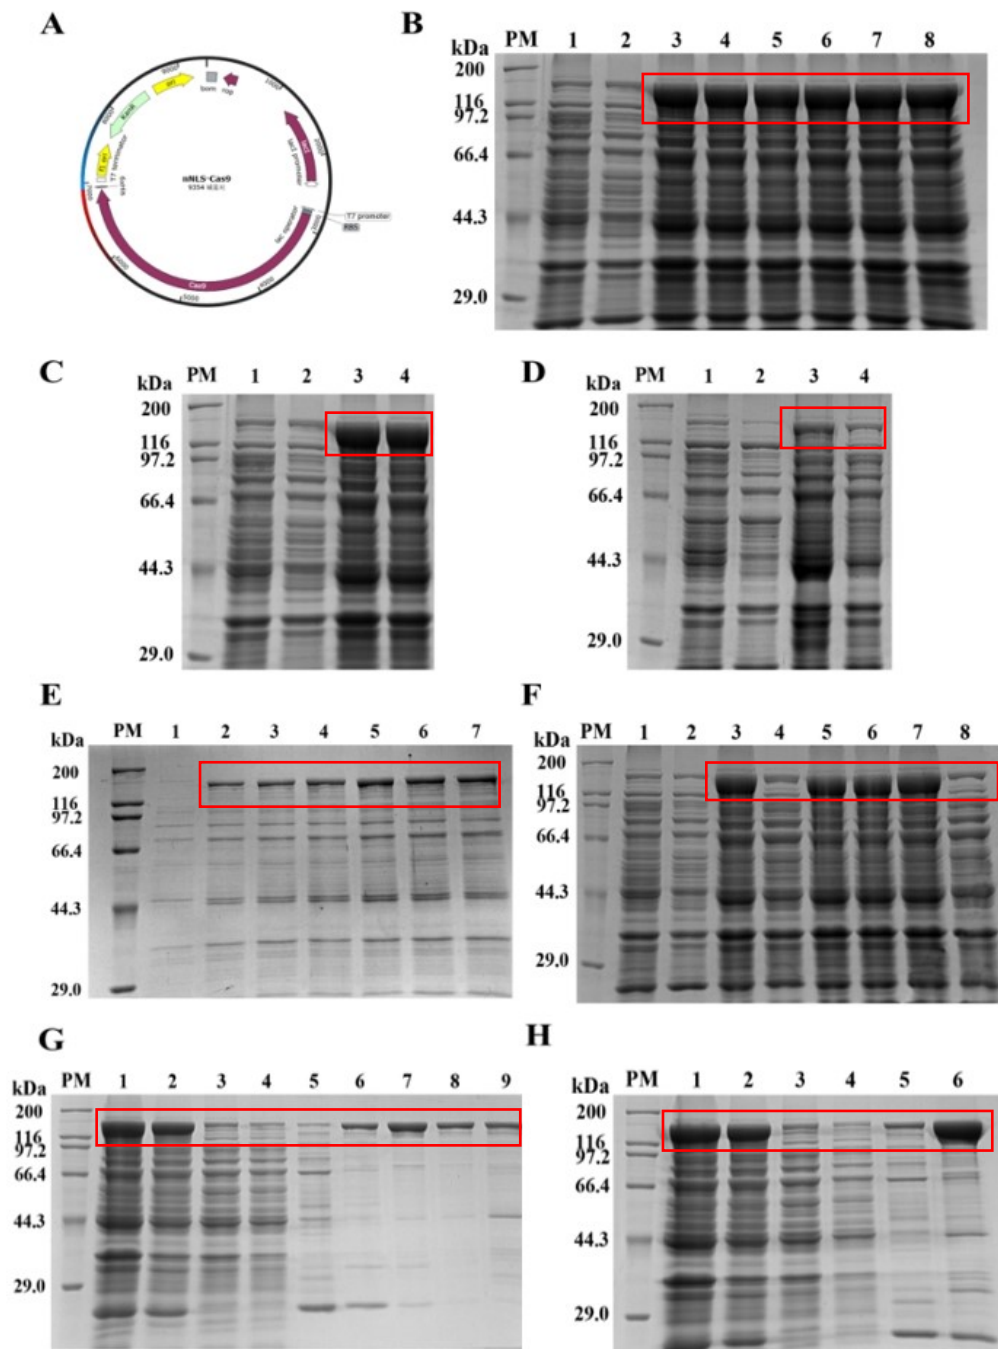

**Figure S3.** Preparation and characterization of NLS<sup>-</sup>-Cas9. (A) Plasmid of pET28b-NLS<sup>-</sup>-Cas9-His. (B) SDS-PAGE of construction of NLS<sup>-</sup>-Cas9 engineering bacteria. PM:Protein Marker; 1-2:ArcticExpress(DE3) negative control bacteria total bacteria lysate and supernatant; 3-8: three batch of genetic engineering bacteria total bacteria lysate and supernatant. (C-D) SDS-PAGE of induction temperature at 18°C (C) and 37°C (D). PM: Protein Marker, 1-2: Rosetta (DE3) pLysS negative control bacteria total bacteria lysate and supernatant 3-4: genetically engineered bacteria total bacteria and supernatant. (E) SDS-PAGE of induction time screening.

1-7: 0, 2, 4, 6, 8, 10 and 12 h. (F) SDS-PAGE of bacteria breaking power screening. 1-2: Rose tta(DE3)pLysS negative control bacteria total bacteria and supernatant 3-4,5-6,7-8: Total bacteria and supernatant of 400 W,500 W,600 W. (G) Screening of imidazole concentration for eluting heteroprotein. 1: bacteria lysate 2: supernatant of bacteria lysate; 3: sample effluent; 4: Binding Buffer effluent; 5-9: 30, 50, 70, 90, 300 mM imidazole eluate. (H) The purification of Cas9 protein using nickel chelation chromatography. 1: bacteria lysate; 2: sample effluent; 3: Binding Buffer effluent; 4-5: Cas9 effluent eluted by 30 and 300 mM imidazole respectively; 6: Protein after ultrafiltration concentration.

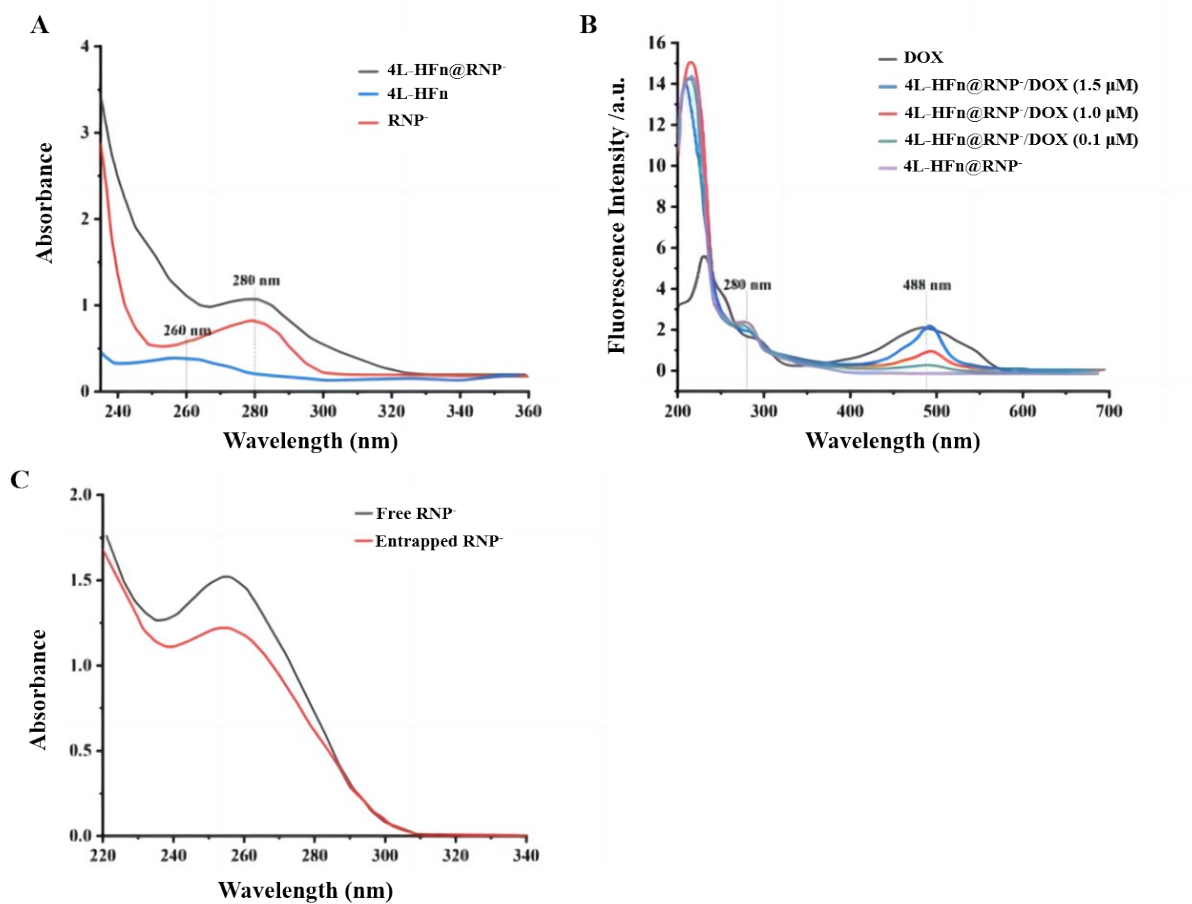

**Figure S4.** Preparation and characterization of 4L-HFn@RNP<sup>-</sup>/DOX. (A) Preparation and UV-vis of 4L-HFn@RNP<sup>-</sup>. (B) Preparation and UV-vis of 4L-HFn@RNP<sup>-</sup>/DOX. (C) Determination of RNP<sup>-</sup> encapsulation rate and drug loading in 4L-HFn@RNP<sup>-</sup>/DOX NPs.

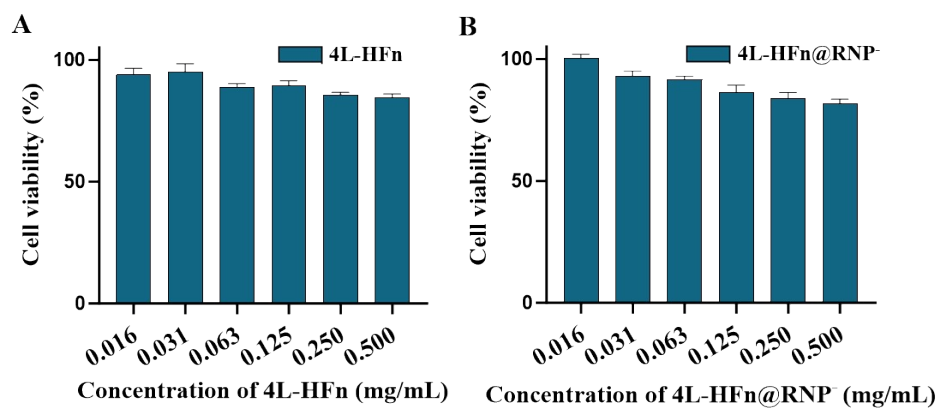

**Figure S5.** MTT test of 4L-HFn and 4L-HFn@RNP/DOX. (A) Cytotoxicity of 4L-HFn on MDA-MB-231 cells (n = 6). (B) Cytotoxicity of 4L-HFn@RNP on MDA-MB-231 cells (n = 6).

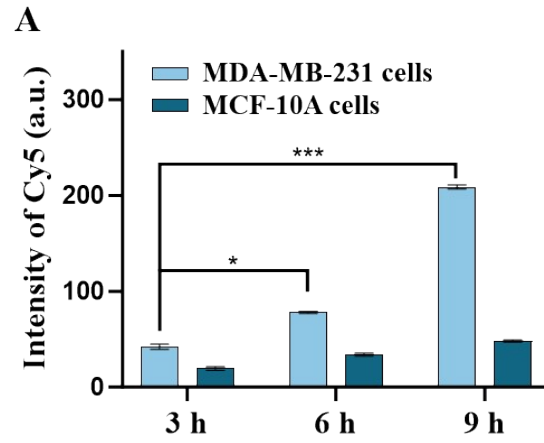

**Figure S6.** Efficiency of 4L-HFn@RNP<sup>-</sup>/DOX delivery of RNP<sup>-</sup>. (A) MDA-MB-231 cells and MCF-10A cells uptake of CLSM mean fluorescence intensity.



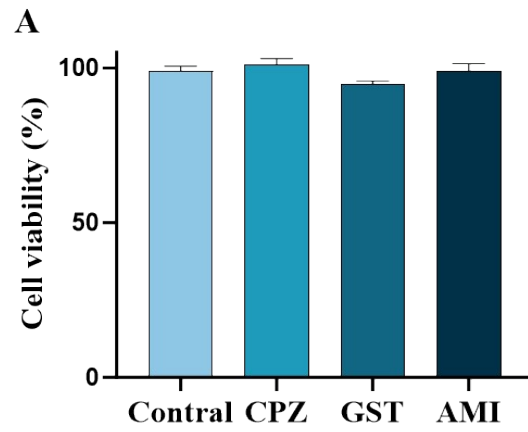

**Figure S7.** MTT test of endocytosis inhibitors. (A) Cytotoxicity of endocytosis inhibitors on MDA-MB-231 cells (n = 6).

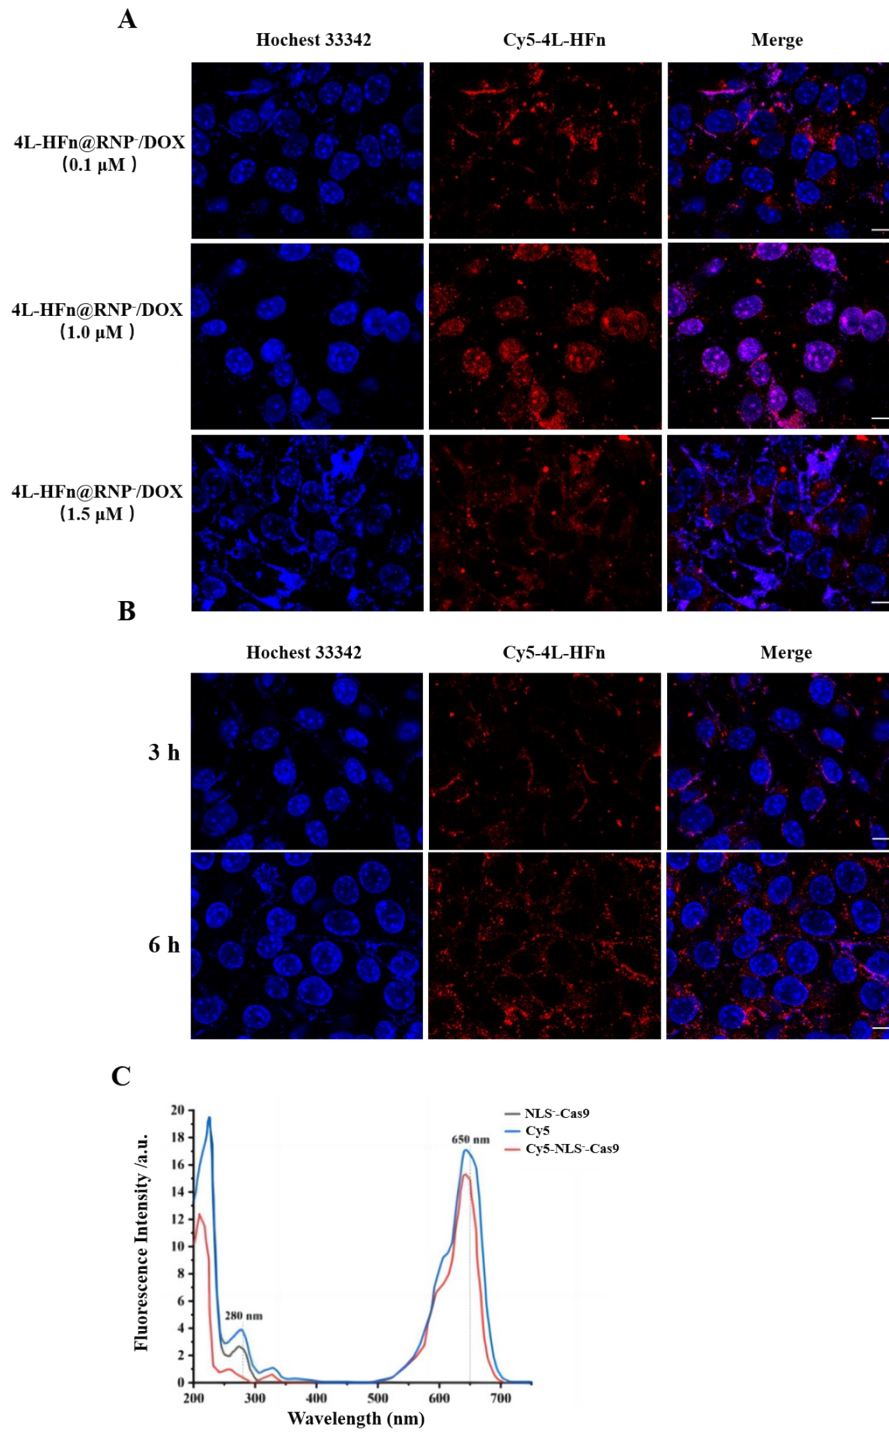

**Figure S8.** Triggering of 4L-HFn into the nucleus at different concentrations of DOX. (A) Following a 9-hour treatment with low, medium, and high concentrations of DOX, the self-triggered nuclear entry and nuclear co-localization of 4L-HFn/DOX were observed. (Scale bar: 10  $\mu\text{m}$ ). (B) Self-triggered nuclear entry and nuclear co-localization of 4L-HFn/DOX in medium DOX concentration. (Scale: 10  $\mu\text{m}$ ). (C) Cy5 fluorescent dye labeled NLS<sup>-</sup>-Cas9.

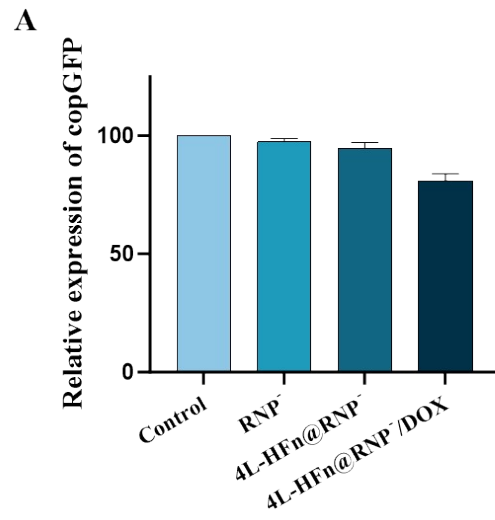

**Figure S9.** Relative expression of copGFP *in vivo* analysis using Image J.

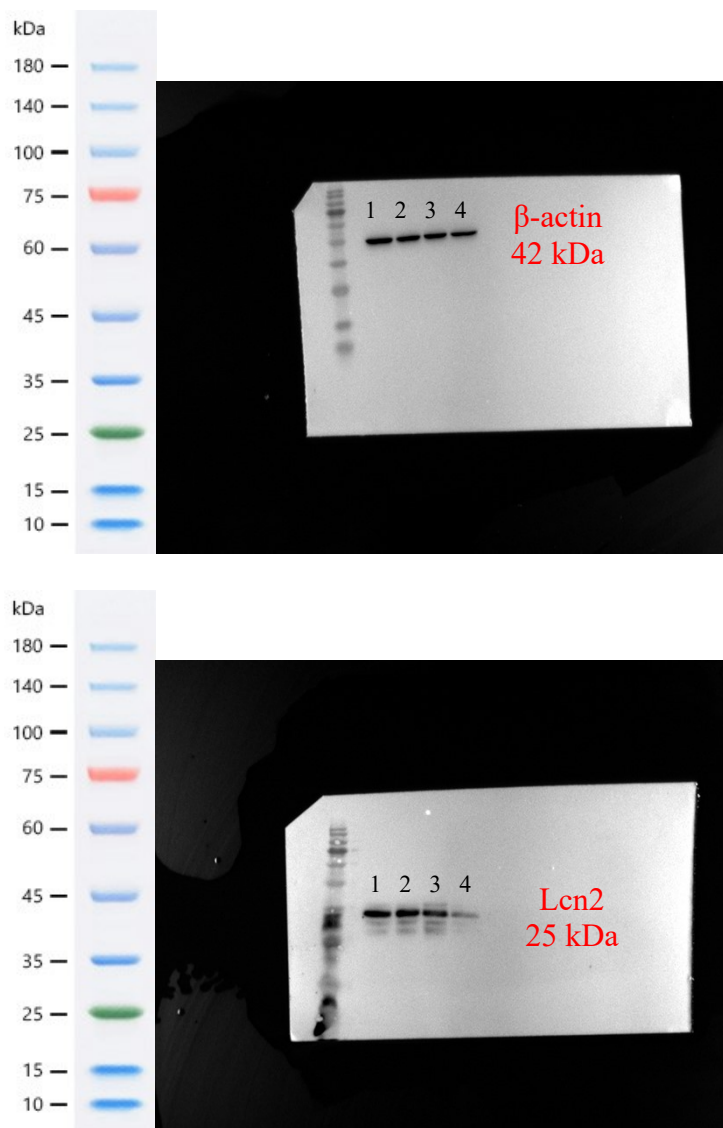

**Figure S10.** The raw data for the western blotting protein bands for Fig.5D ( $\beta$ -actin and Lcn2): 1.Control; 2. RNP-; 3. 4L-HFn@RNP-; 4. 4L-HFn@RNP-/DOX.

**Table S1.** Sequence of NLS-Cas9 used.

| Sequence                                                                                                                                                                                                                                                                                                                                                                                                                                                                                                                                                                                                                                                                                                                                                                                                                                                                                                                                                                                                                                                                                                                                                                                                                                                                                                                                                                                                                                                                                                                                                    | Note                                                   |
|-------------------------------------------------------------------------------------------------------------------------------------------------------------------------------------------------------------------------------------------------------------------------------------------------------------------------------------------------------------------------------------------------------------------------------------------------------------------------------------------------------------------------------------------------------------------------------------------------------------------------------------------------------------------------------------------------------------------------------------------------------------------------------------------------------------------------------------------------------------------------------------------------------------------------------------------------------------------------------------------------------------------------------------------------------------------------------------------------------------------------------------------------------------------------------------------------------------------------------------------------------------------------------------------------------------------------------------------------------------------------------------------------------------------------------------------------------------------------------------------------------------------------------------------------------------|--------------------------------------------------------|
| MDKKYSIGLDIGTNSVGWAVITDDYKVPSSKKFKVLGNTDRHSIKKN<br>LIGALLFDSGETAEATRLKRTARRRYTRRKNRICYLQEIFSNEMAKV<br>DDSFHRLVESFLVEEDKKHERHPIFGNIVDEVAYHEKYPTIYHLRKK<br>LVDSTDKADRLRIYLALAHMIKFRGHFLIEGDLNPDNSDVKLFIQLV<br>QTYNQLFEENPINASGVDAKAILSARLSKSRLENLIAQLPGEKKNGL<br>FGNLIASLGLTPNFKSNFDLAEDAQLQSKDQYDDDLNLLAQIGD<br>QYADLFLAAKNLSDAILLSDILRVNTEITKAPLSASMIKRYDEHHQDL<br>TLLKALVRQQLPEKYKEIFFDQSKNGYAGYIDGGASQEEFYKFIKPI<br>EKMDGTEELLVKLNREDLLRKQRTFDNGSIPHQIHLGELHAILRRQE<br>DFYPFLKDNREKIEKILTFRIPYYVGPLARGNSRFAWMTRKSEETITP<br>WNFEEVVDKGASAQSFIERMTNFDKNLPNEKVLPHSLLYEYFTVY<br>NELTKVKYVTEGMRKPAFLSGEQKKAIVDLLFKTNRKVTVKQLKED<br>YFKKIECFDSVEISGVEDRFNASLGTYHDLLKIIKDKDFLDNEENEDIL<br>EDIVLTLTLFEDREMIEERLKYAHLFDDKVMKQLKRRRYTGWGRL<br>SRKLINGIRDKQSGKTILDFLKSDFANRNFMLIHDDSLTFKEDIQK<br>AQVSGQGDSLHEHIANLAGSPAIKKGILQTVKVVDELVKVMGRHKP<br>ENIVIAMARENQTTQKGQKNSRERMKRIIEGKELGSQILKEHPVENT<br>QLQNEKLYLYLQNGRDMYVDQELDINRLSDYDVDHIVPQSFLKDD<br>SIDNKVLTRSDKNRGKSDNVPSEEVVKKMKNYWRQLLNAKLITQRK<br>FDNLTKAERGGELSELDKAGFIKRQLVETRQITKHVAQILDSRMNTKY<br>DENDKLIREVKVITLKSCLVSDFRKDFQFYKREINNYHHAHDAYLN<br>AVVGTALIKKYPKLESEFVYGDYKVYDVRKMIKSEQEIGKATAKY<br>FFYSNIMNFFKTEITLANGEIRKRPLIETNGETGEIVWDKGRDFATVR<br>KVLSPQVNIVKKTEVQTGGFSKESILPKRNSDKLIARKKDWDPKKY<br>GGFDSPTVAYSVLVVAKVEKGKSKKLKSVKELLGITIMERSSSFENPI<br>DFLEAKGYKEVKKDLIIKLPKYSLFELENGRKRMLASAGELQKGNEL<br>ALPSKYVNFLYLASHYEKLGSPEDNEQKQLFVEQHKHYLDEIIEQIS<br>EFSKRVLADANLDKVL SAYNKHRRDKPIREQAENIIHLFTLTNLGAPA<br>AFKYFDTTIDRKRYTSTKEVL DATLIHQ SITGLYETRIDLSQLGGDSR<br>AD (PKKKRKV) AAAL EHHHHHH | Red for<br>deleted<br>SV40-NLS;<br>Blue for 6 ×<br>His |

**Table S2.** Encapsulation rate and drug loading of DOX for 4L-HFn@RNP-/DOX at low, medium and high DOX concentrations (n = 3)

| 4L-HFn@RNP-/DOX<br>(Concentration of DOX,<br>$\mu\text{M}$ ) | Encapsulation<br>efficiency (%) | Loading<br>Content (%) | Quantity of trigger agent<br>DOX contained in each<br>4L-HFn@RNP-/DOX |
|--------------------------------------------------------------|---------------------------------|------------------------|-----------------------------------------------------------------------|
| 0.1                                                          | $91.20 \pm 0.38$                | $0.77 \pm 0.03$        | $0.91 \pm 0.37$                                                       |
| 1.0                                                          | $90.58 \pm 0.19$                | $1.53 \pm 0.11$        | $1.81 \pm 0.38$                                                       |
| 1.5                                                          | $91.46 \pm 0.26$                | $3.86 \pm 0.09$        | $4.57 \pm 0.13$                                                       |

**Table S3.** Sequences of sgRNA and T7E1 primers used.

---

|                          | Sequence(5' to 3')                                                                                                     |
|--------------------------|------------------------------------------------------------------------------------------------------------------------|
| sgRNA (Targeting Lcn2)   | <u>ACGAGGTA</u> ACTCGTTAATCCGTTTTAGAGCTAGA<br>AATAGCAAGTTAAAATAAGGCTAGTCCGTTATCA<br>ACTTGAAAAAGTGGCACCGAGTCGGTGCTTTTTT |
| sgRNA (Targeting copGFP) | <u>AGTGCGCCG</u> GCCGGAGCATCCAAAATCTCGATCT<br>TTATCGTTCAATTTTATTCCGATCAGGCAATAGTT<br>GAACTTTTTCACCGTGGCTCAGCCACGAAAA   |
| T7E1 primer (Forward)    | GGCAACATTAAGAGTGAGTC                                                                                                   |
| T7E1 primer (Reverse)    | TTGGAGAAGCGGATGAAG                                                                                                     |

---
